# Supplementary material for: Sarcocystis species in bovine carcasses from a Belgian abattoir: a cross-sectional study
Source: PubMed Central journal article supplement (PMC8138977; doi:10.1186/s13071-021-04788-1), 2021-05-21
Supplement: 13071_2021_4788_MOESM1_ESM.pdf [file 13071_2021_4788_MOESM1_ESM.pdf]

**Additional File 1.** Expected fragment sizes (in base pairs) from digestion of 18S rDNA PCR products of bovine *Sarcocystis* species with *FokI* and *Bfal*

|                       | FokI                                         | Bfal                                                                                                       |
|-----------------------|----------------------------------------------|------------------------------------------------------------------------------------------------------------|
| <i>S. cruzi</i>       | 321, 535 <sup>1-3</sup>                      | 108, 360, 388 <sup>1-3</sup>                                                                               |
| <i>S. hirsuta</i>     | 77, 81, 207, 518 <sup>1-6</sup>              | <b>403, 480</b> <sup>1-4</sup> (or 210, 270, 403 <sup>5</sup> or 108, 372, 402 <sup>6</sup> )*             |
| <i>S. bovifelis</i> # | / <sup>1-5</sup>                             | <b>108, 353, 380</b> <sup>1-3</sup> (or 30, 108, 350, 356 <sup>4</sup> or 70, 108, 309, 359 <sup>5</sup> ) |
| <i>S. bovini</i> #    | / <sup>1-6</sup>                             | <b>108, 356, 380</b> <sup>1-4</sup> (or 108, 145, 214, 379 <sup>5</sup> or 380, 464 <sup>6</sup> )         |
| <i>S. hominis</i>     | / <sup>1-3</sup> (or 324, 528 <sup>4</sup> ) | 382, 474 <sup>1-4</sup>                                                                                    |
| <i>S. heydorni</i> #  | / <sup>1,2</sup>                             | 108, 368, 389 <sup>1,2</sup>                                                                               |

Small numbers mark the corresponding gene sequences with accession numbers.

*S. cruzi* (1: JX679467; 2: AF017120; 3: KT901167)

*S. hirsuta* (1: KT901166; 2: KC209741; 3: JX855283; 4: KT901158; 5: KT901157; 6: AF017122)

*S. bovifelis* (1: KT901138; 2: KT901130; 3: KT901123; 4: KT901117; 5: KT901131)

*S. bovini* (1: KT901139; 2: KT901140; 3: KT901142; 4: KT901155; 5: KT901146; 6: KT901141)

*S. hominis* (1: JX679470; 2: AF176944; 3: KF954731; 4: JX679471)

*S. heydorni* (1: KX057996; 2: KX057997)

/ = No digestion

# *S. bovini*, *S. bovifelis* and *S. heydorni* cannot be unambiguously differentiated from each other by the 18S rDNA PCR-RFLP.

\*Digestion profiles shown in brackets are possible but rare.
