# Supplementary material for: Sarcocystis species in bovine carcasses from a Belgian abattoir: a cross-sectional study
Source: PubMed Central journal article supplement (PMC8138977; doi:10.1186/s13071-021-04788-1), 2021-05-21

**Additional file 2.** *Sarcocystis* positivity rate in (A) heart and (B) diaphragm samples among different age categories

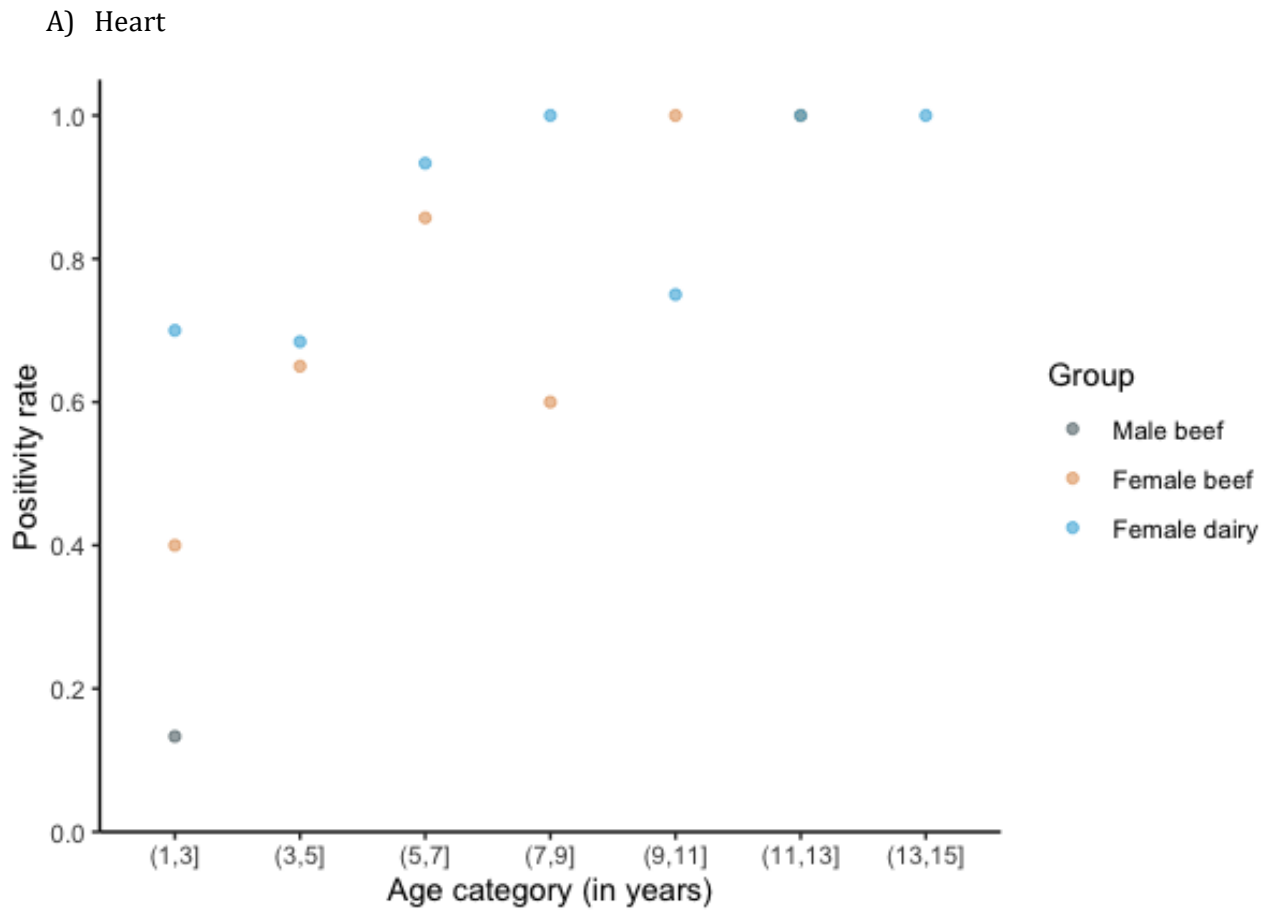

B) Diaphragm

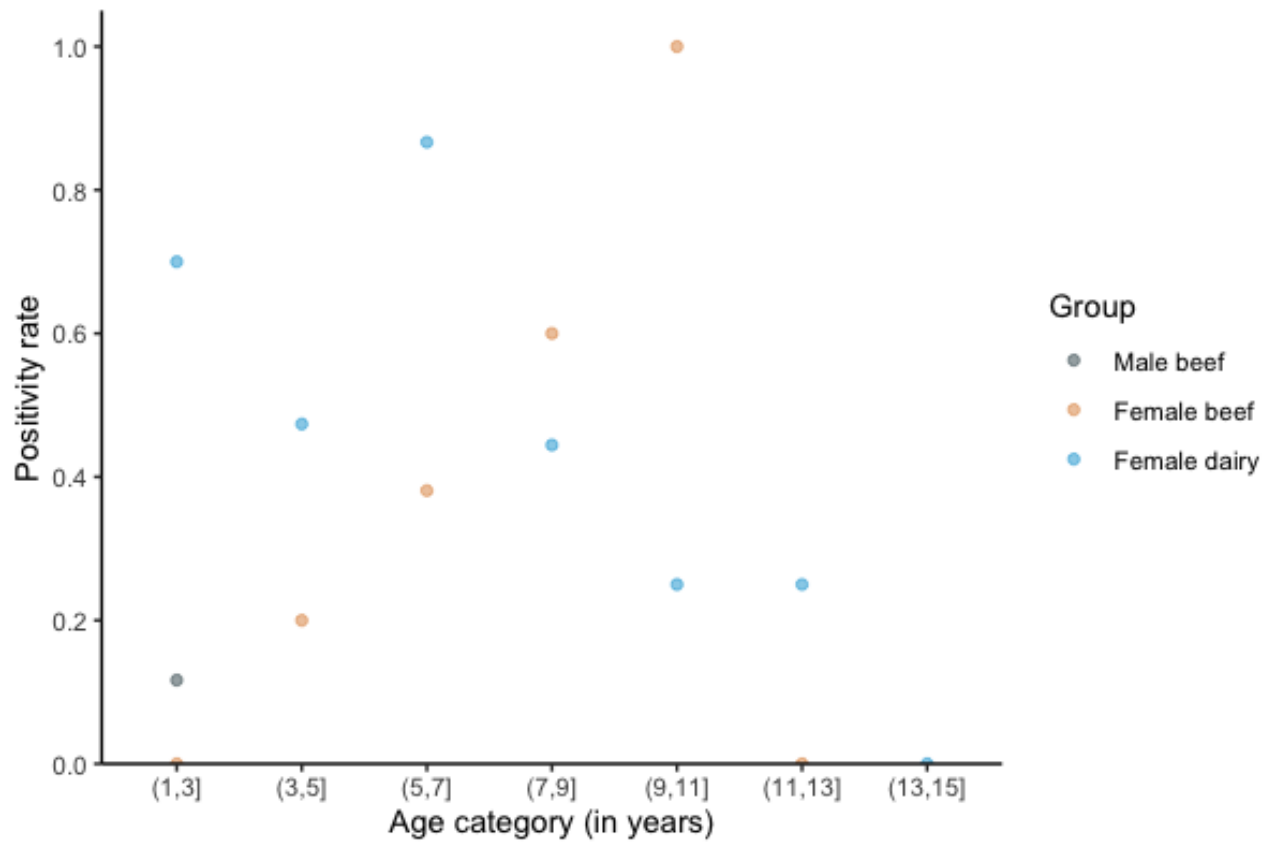

Supplement: 13071_2021_4788_MOESM2_ESM.pdf [file 13071_2021_4788_MOESM2_ESM.pdf]
